# Supplementary material
Source: PubMed Central journal article supplement (PMC4908820)
Supplement: NIHMS786140-supplement-suppapp.pdf [file NIHMS786140-supplement-suppapp.pdf]

## Supplementary Appendix

This appendix has been provided by the authors to give readers additional information about their work.

Supplement to: Michler RE, Smith PK, Parides MK, et al. Two-year outcomes of surgical treatment of moderate ischemic mitral regurgitation. N Engl J Med. DOI: 10.1056/NEJMoa1602003

## SUPPLEMENTARY APPENDICES

### TABLE OF CONTENTS

|                                                                      |   |
|----------------------------------------------------------------------|---|
| Cardiothoracic Surgical Trials Network (CTSN) Investigators.....     | 2 |
| Characterization of Patient Population .....                         | 5 |
| Figure S1 Consort Diagram .....                                      | 7 |
| Table S1 Baseline and Operative Characteristics of the Patients..... | 8 |
| Background on Wall Motion Score Analyses .....                       | 9 |

## **Cardiothoracic Surgical Trials Network (CTSN)**

The members of the Cardiothoracic Surgical Trials Network (CTSN) involved in this study are as follows:

**National Heart, Lung and Blood Institute:** Marissa A. Miller, Wendy C. Taddei-Peters, Dennis Buxton, Ron Caulder, Nancy L. Geller, David Gordon, Neal O. Jeffries, Albert Lee;  
**National Institute of Neurological Disorders and Stroke:** Claudia S. Moy;  
**Canadian Institutes of Health Research:** Ilana Kogan Gombos, Jennifer Ralph;

**Network Chairs:** *Toronto General Hospital*, Richard Weisel, (Chair); *Christiana Care Health System*, Timothy J. Gardner, (Chair-Emeritus); *Brigham and Women's Hospital*, Patrick T. O'Gara, (Co-Chair); *Mount Sinai Health System*, Eric A. Rose, (Vice Chair);

**Data Coordinating Center:** *International Center for Health Outcomes and Innovation Research at Icahn School of Medicine at Mount Sinai*, Annetine C. Gelijns, Michael K. Parides, Deborah D. Ascheim, Alan J. Moskowitz, Emilia Bagiella, Ellen Moquete, Helena Chang, Melissa Chase, Yingchun Chen, Seth Goldfarb, Lopa Gupta, Katherine Kirkwood, Edlira Kumbarece, Ron Levitan, Karen O'Sullivan, Jessica Overbey, Milerva Santos, Michael Weglinski, Paula Williams, Carrie Wood, Xia Ye;

**Clinical Site Investigators:** *Aarhus University Hospital:* Sten Lyager Nielsen (PI), Henrik Wiggers, Henning Malgaard; *Baylor Research Institute :* Michael Mack (PI), Tracine Adame, Natalie Settele, Jenny Adams, William Ryan, Robert L. Smith, Paul Grayburn; *Brigham and Women's Hospital:* Frederick Y. Chen (PI), Anju Nohria, Lawrence Cohn, Prem Shekar, Sary Aranki, Gregory Couper, Michael Davidson, R. Morton Bolman III, Anne Burgess, Debra Conboy; *Centre Hospitalier de l'Université de Montréal:* Nicolas Noiseux (PI), Louis-Mathieu Stevens, Ignacio Prieto, Fadi Basile, Joannie Dionne, Julie Fecteau; *Cleveland Clinic Foundation:* Eugene H. Blackstone (PI), A. Marc Gillinov, Pamela Lackner, Leoma Berroteran, Diana Dolney, Suzanne Fleming, Roberta Palumbo, Christine Whitman, Kathy Sankovic, Denise Kosty Sweeney; *NHLBI Clinical Research Scholars:* Gregory Pattakos, Pamela A. Clarke; *Columbia University:* Michael Argenziano (PI), Mathew Williams, Lyn Goldsmith, Craig R. Smith, Yoshifumi Naka, Allan Stewart, Allan Schwartz; Daniel Bell, Danielle Van Patten, Sowmya Sreekanth; *Duke University:* Peter K. Smith (PI), John H. Alexander, Carmelo A. Milano, Donald D. Glower, Joseph P. Mathew, J. Kevin Harrison, Stacey Welsh; *NHLBI Clinical Research Scholars:* Mark F. Berry, Cyrus J. Parsa, Betty C. Tong, Judson B. Williams; *East Carolina Heart Institute:* T. Bruce Ferguson (PI), Alan P. Kypson, Evelio Rodriguez, Malissa Harris, Brenda Akers, Allison O'Neal; *Emory University:* John D. Puskas (PI)\*, Vinod H. Thourani, Robert Guyton, Jefferson Baer, Kim Baio, Alexis A. Neill; *Hôpital Laval:* Pierre Voisine (PI), Mario Senechal, François Dagenais, Kim O'Connor, Gladys Dussault, Tatiana Ballivian, Suzanne Keilani; *Inova Heart & Vascular Institute:* Alan M. Speir (PI), Patrick Magee, Niv Ad, Sally Keyte, Minh Dang; *Jewish Hospital:* Mark Slaughter (PI), Marsha

Headlee, Heather Moody, Naresh Solankhi, Emma Birks; ***Mission Hospital*** : Mark A. Groh (PI), Leslie E. Shell, Stephanie A. Shepard, Benjamin H. Trichon, Tracy Nanney, Lynne C. Hampton; ***Montefiore-Einstein Heart Center***: Robert E. Michler (PI), David A. D'Alessandro, Joseph J. DeRose, Jr., Daniel J. Goldstein, Ricardo Bello, William Jakobleff, Mario Garcia, Cynthia Taub, Daniel Spevak, Roger Swayze; ***Montreal Heart Institute***: Louis P. Perrault (PI), Arsène-Joseph Basmadjian, Denis Bouchard, Michel Carrier, Raymond Cartier, Michel Pellerin, Jean François Tanguay, Ismail El-Hamamsy, André Denault, Jonathan Lacharité, Sophie Robichaud; ***NIH Heart Center at Suburban Hospital***: Keith A. Horvath (PI), Philip C. Corcoran, Michael P. Siegenthaler, Mandy Murphy, Margaret Iraola, Ann Greenberg; ***Ohio State University Medical Center***: Chittoor Sai-Sudhakar (PI), Ayseha Hasan, Asia McDavid, Bradley Kinn; ***Hôpital du Sacré-Coeur de Montréal***: Pierre Pagé (PI), Carole Sirois; ***St. Michael's Hospital***: David Latter (Co-PI), Howard Leong-Poi (Co-PI), Daniel Bonneau, Lee Errett, Mark D. Peterson, Subodh Verma, Randi Feder-Elituv; ***Sunnybrook Health Sciences Centre***: Gideon Cohen (PI), Campbell Joyner, Stephen E. Fremes, Fuad Moussa, George Christakis, Reena Karkhanis; ***Toronto General Hospital***: Terry Yau (PI), Michael Farkouh, Anna Woo, Robert James Cusimano, Tirone David, Christopher Feindel, Lisa Garrard, Suzanne Fredericks, Amelia Mociornita; ***University of Alberta Hospital***: John C. Mullen (PI), Jonathan Choy, Steven Meyer, Emily Kuurstra; ***University of Maryland*** : James S. Gammie (PI), Cindi A. Young, Dana Beach; ***University of Pennsylvania***: Michael A. Acker (PI), Pavan Atluri, Y. Joseph Woo, Mary Lou Mayer; ***University of Southern California*** : Michael Bowdish (PI), Vaughn A. Starnes, David Shavalle, Ray Matthews, Shadi Javadifar, Linda Romar; ***University of Virginia***: Irving L. Kron (PI), Gorav Ailawadi, Karen Johnston, John M. Dent, John Kern, Jessica Keim, Sandra Burks, Kim Gahrning;

**Protocol Review Committee**: David A. Bull (Chair); Patrice Desvigne-Nickens, Executive Secretary; Dennis O. Dixon, Mark Haigney, Richard Holubkov, Alice Jacobs, Frank Miller, John M. Murkin, John Spertus, Andrew S. Wechsler;

**Data and Safety Monitoring Board**: Frank Sellke (Chair); Cheryl L. McDonald, Executive Secretary; Robert Byington, Neal Dickert, Dennis O. Dixon, John S. Ikonmidis, David O. Williams, Clyde W. Yancy;

**Medical Monitors**: James C. Fang, Nadia Giannetti, Wayne Richenbacher;

**Overall Event Adjudication Committee**: Vivek Rao (Chair); Karen L. Furie, Rachel Miller, Sean Pinney, William C. Roberts, Mary N. Walsh;

**Cardiopulmonary Exercise Core Lab, Henry Ford Hospital**: Stephen J. Keteyian, Clinton A. Brawner, Heather Aldred;

**Echo Core Lab, Massachusetts General Hospital**: Judy Hung, Xin Zeng;

**Neurocognitive Core Lab, Duke University Medical Center:** Joseph P. Mathew, Jeffrey Browndyke, Yanne Toulgoat-Dubois.

*\*John D. Puskas has subsequently moved to Mount Sinai Beth Israel, New York*

### **Characterization of Patient Population**

The patient population for this trial consists of patients with moderate ischemic mitral regurgitation and clinically significant coronary artery disease with a clinical indication for coronary artery bypass grafting (CABG). All patients who meet the eligibility criteria may be included in the study regardless of gender, race or ethnicity.

### ***Inclusion Criteria***

1. Moderate mitral regurgitation in the judgment of the clinical site echocardiographer, assessed by transthoracic echocardiogram. Assessment of mitral regurgitation will be performed using an integrative method (Zoghbi W. et al. J. American Society of Echocardiography. 2003;16:777-802. see appendix). Quantitative guidelines as proposed would be: ERO between 0.2 cmsq to 0.39 cmsq. If  $ERO < 0.2$ , then the degree of mitral regurgitation will be guided by other color Doppler quantitative methods (jet area/left atrial area ratio, vena contracta, supportive criteria in an integrated fashion (See Appendix I).
2. Coronary artery disease amenable to coronary artery bypass grafting and a clinical indication for revascularization
3. Age  $\geq 18$  years
4. Able to sign Informed Consent and Release of Medical Information forms

### ***Exclusion Criteria***

1. Any evidence of structural (chordal or leaflet) mitral valve disease
2. Inability to derive ERO and ESVI by transthoracic echocardiography
3. Planned concomitant intra-operative procedures (with the exception of closure of patent foramen ovale [PFO] or atrial septal defect [ASD], left atrial appendage ligation/excision or Maze procedure)
4. Prior surgical or percutaneous mitral valve intervention
5. Contraindication to cardiopulmonary bypass (CPB)
6. Clinical signs of cardiogenic shock at the time of randomization
7. Treatment with chronic intravenous inotropic therapy at the time of randomization
8. Severe, irreversible pulmonary hypertension in the judgment of the investigator
9. ST segment elevation MI requiring intervention within 7 days prior to randomization

10. Congenital heart disease (except PFO or ASD)
11. Evidence of cirrhosis or hepatic synthetic failure
12. Recent history of psychiatric disease (including drug or alcohol abuse) that is likely to impair compliance with the study protocol, in the judgment of the investigator
13. Therapy with an investigational intervention at the time of screening, or plan to enroll patient in additional investigational intervention study during participation in this trial
14. Any concurrent disease with life expectancy < 2 years
15. Pregnancy at the time of randomization

**Figure S1 Consort Diagram**

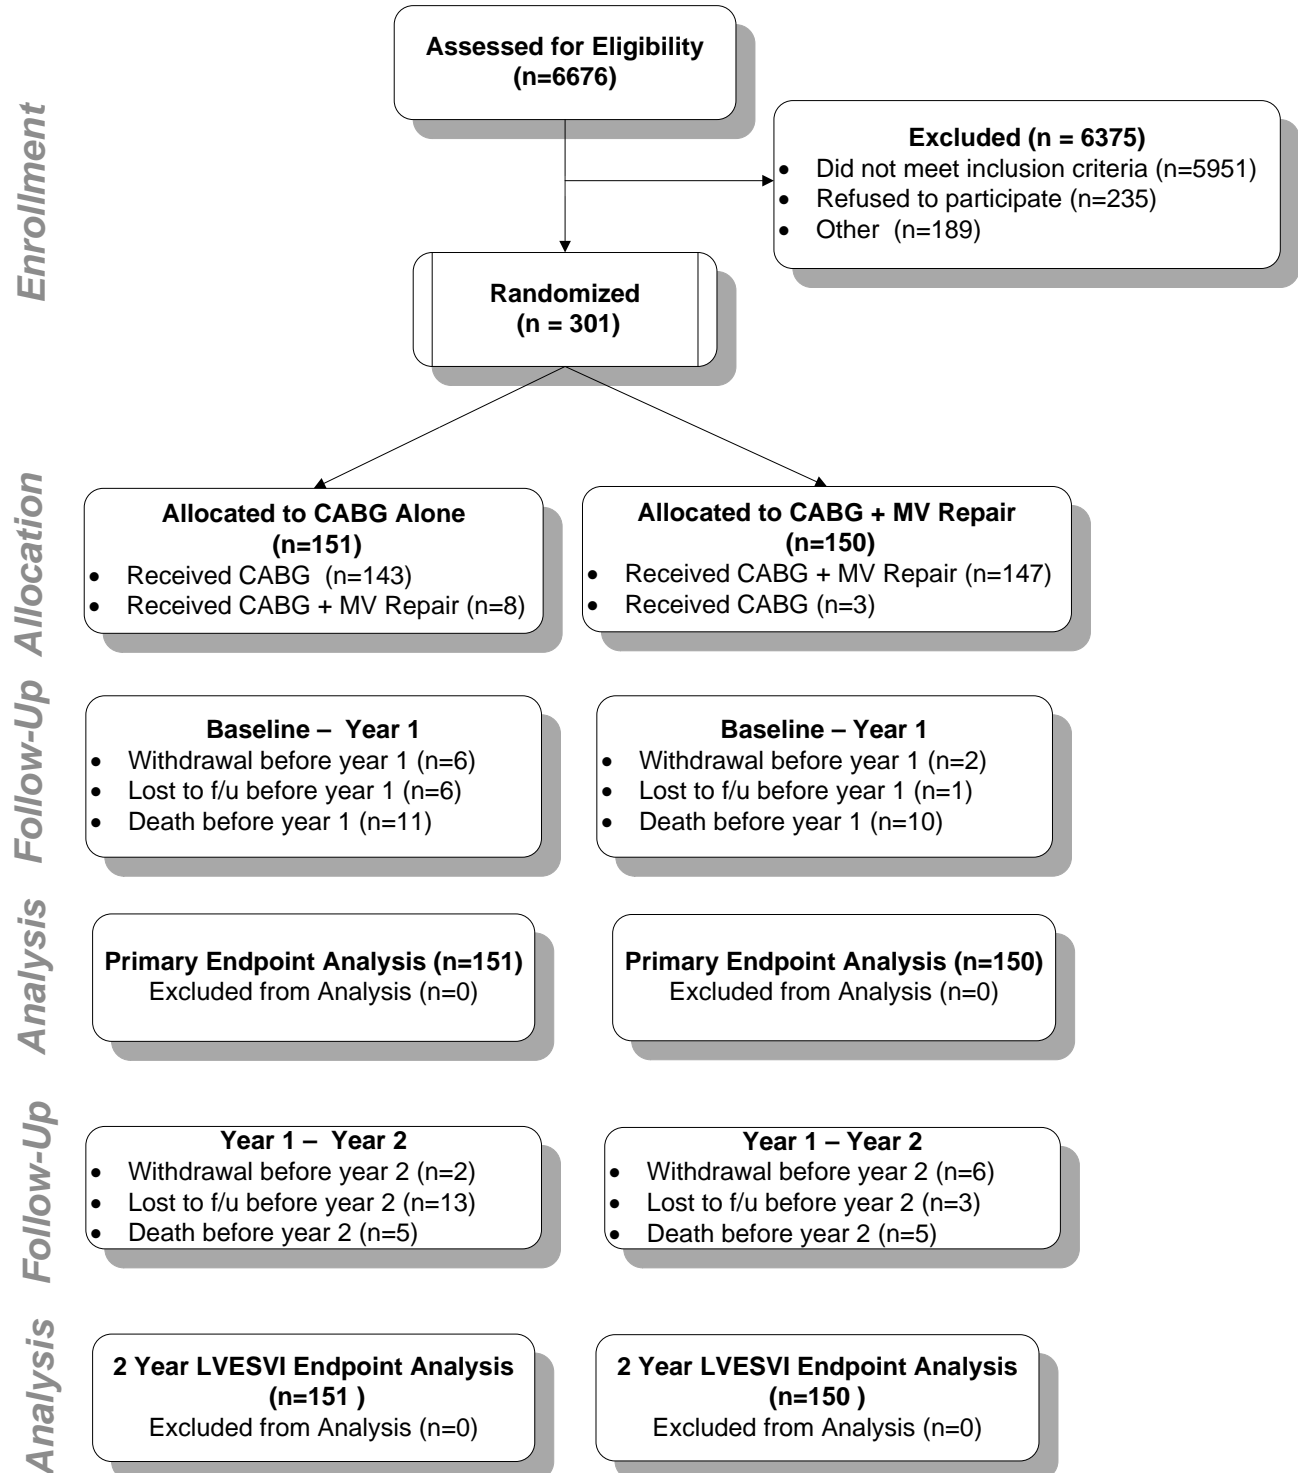

**Table S1.** Baseline and Operative Characteristics of the Patients\*

| Characteristic                                    | CABG Alone (N=151) | CABG + MV Repair | P-value |
|---------------------------------------------------|--------------------|------------------|---------|
|                                                   |                    | (N=150)          |         |
| Male                                              | 99 (65.6)          | 106 (70.7)       | 0.34    |
| Age (yr)                                          | 65.2 ± 11.3        | 64.3 ± 9.6       | 0.49    |
| White                                             | 122 (80.8)         | 115 (76.7)       | 0.38    |
| Hispanic                                          | 14 (9.3)           | 12 (8.0)         | 0.69    |
| Diabetes                                          | 66 (43.7)          | 76 (50.7)        | 0.23    |
| Renal Insufficiency                               | 27/150 (18.0)      | 24 (16.0)        | 0.64    |
| Prior CABG                                        | 4 (2.8)            | 4 (2.8)          | 1.00    |
| Prior PCI                                         | 24 (15.9)          | 26 (17.3)        | 0.74    |
| Heart Failure                                     | 75 (50.0)          | 82 (54.7)        | 0.39    |
| Myocardial Infarction                             | 97 (64.2)          | 103 (68.7)       | 0.42    |
| Atrial Fibrillation                               | 35/150 (23.3)      | 19/149 (12.8)    | 0.02    |
| ICD                                               | 6 (4.0)            | 6 (4.0)          | 0.99    |
| Stroke                                            | 9 (6.0)            | 15 (10.0)        | 0.20    |
| LVESVI (ml/m <sup>2</sup> )                       | 54.8 (24.9)        | 59.6 (25.7)      | 0.10    |
| LVEF (%)                                          | 41.2 ± 11.6        | 39.3 ± 10.9      | 0.13    |
| EROA (cm <sup>2</sup> )                           | 0.2 ± 0.1          | 0.2 ± 0.1        | 0.17    |
| BSA (m <sup>2</sup> )                             | 1.9 ± 0.2          | 1.9 ± 0.3        | 0.93    |
| Angina Scale (CCSC) <sup>‡</sup> – None           | 45/150 (30.0)      | 50/149 (33.6)    | 0.77    |
| Angina Scale (CCSC) <sup>‡</sup> – Class III & IV | 51/150 (34.0)      | 46/149 (30.9)    |         |
| NYHA <sup>‡</sup> – Class III & IV                | 67 (44.4)          | 55 (36.7)        | 0.17    |
| MLHF <sup>‡</sup>                                 | 43.0 ± 27.2        | 40.4 ± 27.5      | 0.44    |
| Concomitant procedure – LAA Management            | 8 (5.3)            | 12 (8.0)         | 0.35    |
| Concomitant procedure – Atrial Maze               | 10 (6.6)           | 11 (7.3)         | 0.81    |
| Number of Grafts                                  | 3.3 ± 0.9          | 3.2 ± 0.9        | 0.26    |
| Aortic Cross Clamp Time (minutes)                 | 74.7 ± 36.7        | 117.1 ± 35.4     | <0.001  |
| Cardiopulmonary Bypass Time (minutes)             | 106.8 ± 49.7       | 163.1 ± 54.9     | <0.001  |

\*Plus-minus values are means ± SD, categorical values are n (%); <sup>‡</sup>CSCC = Canadian Cardiovascular Society Classification; NYHA = Median New York Heart Association Functional Class: 1(best) – 4 (worst); MLHF= Minnesota Living with Heart Failure questionnaire: 0 (best) – 105 (worst)

## Wall Motion Segments

This figure depicts the 17 segment model of wall motion scores. We considered segments 3, 4, 5, 9, 10, 11 and 15 as the inferior-posterior-lateral segments, which are the segments correspond to the right coronary and circumflex distribution that supply the papillary muscles.

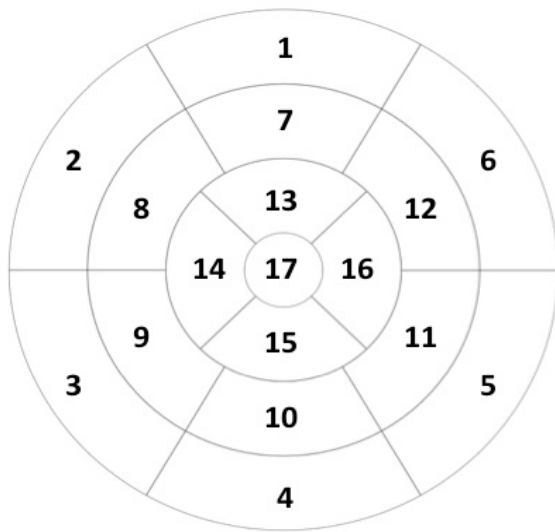

- 1- Basal anterior
- 2- Basal anteroseptal
- 3- Basal inferoseptal
- 4- Basal inferior
- 5- Basal Inferolateral
- 6- Basal anterolateral
- 7- Mid anterior
- 8- Mid anteroseptal
- 9- Mid inferoseptal
- 10- Mid inferior
- 11- Mid Inferolateral
- 12- Mid anterolateral
- 13- Apical anterior
- 14- Apical septal
- 15- Apical inferior
- 16- Apical lateral
- 17- Apex
